# Supplementary material for: Biochemical Characterization of Kat1: a Domesticated hAT-Transposase that Induces DNA Hairpin Formation and MAT-Switching
Source: PubMed Central journal article supplement (PMC4763223; doi:10.1038/srep21671), 2016-02-23
Supplement: srep21671-s1.pdf [file srep21671-s1.pdf]

## Biochemical Characterization of Kat1: a Domesticated *hAT*-Transposase that Induces DNA Hairpin Formation and *MAT*-Switching

Kishore K. Chiruvella, Naghmeh Rajaei, Venkateswara Rao Jonna, Anders Hofer and Stefan U. Åström

### Supplementary information

**Supplementary Table 1. List of oligonucleotides used for generating substrates for DNA binding, DNA cleavage and DNA strand transfer assays**

| Name  |               | DNA sequence (5'-3')                         | Comments  |
|-------|---------------|----------------------------------------------|-----------|
| KKC3  | Top strand    | TGAATATATCCATCTTAATCAGACGTATAC<br>AGAATTCACC | Figure 1  |
| KKC4  | Bottom strand | GGTGAATTCTGTATACGTCTGATTAAGATG<br>GATATATTCA | Figure 1  |
| KKC5  | Top strand    | TGAATATATCCATCTTAATCAGACGTATAC<br>tacgacatcg | Figure S5 |
| KKC6  | Bottom strand | cgatgctgtaGTATACGTCTGATTAAGATGGAT<br>ATATTCA | Figure S5 |
| KKC7  | Top strand    | CATCTTAATCAGACGTATACAGAATTCAC<br>C           | Figure S5 |
| KKC8  | Bottom strand | GGTGAATTCTGTATACGTCTGATTAAGATG               | Figure S5 |
| KKC21 | Top strand    | TGAAGCTATCCATCTTAATCAGACGTATAC<br>AGAATTCACC | Figure 2  |
| KKC22 | Bottom strand | GGTGAATTCTGTATACGTCTGATTAAGATG<br>GATAGCTTCA | Figure 2  |
| KKC23 | Top strand    | TGAATATCGCCATCTTAATCAGACGTATAC<br>AGAATTCACC | Figure 2  |
| KKC24 | Bottom strand | GGTGAATTCTGTATACGTCTGATTAAGATG<br>GCGATATTCA | Figure 2  |
| KKC25 | Top strand    | TGAATATATCACTCTTAATCAGACGTATAC<br>AGAATTCACC | Figure 2  |
| KKC26 | Bottom strand | GGTGAATTCTGTATACGTCTGATTAAGAGT<br>GATATATTCA | Figure 2  |
| KKC27 | Top strand    | TGAATATATCCATCTTCAGCAGACGTATAC<br>AGAATTCACC | Figure 2  |

|        |                |                                               |                                                                                                           |
|--------|----------------|-----------------------------------------------|-----------------------------------------------------------------------------------------------------------|
| KKC28  | Bottom strand  | GGTGAATTCTGTATACGTCTGCTGAAGAT<br>GGATATATTCA  | Figure 2                                                                                                  |
| KKC29  | Top strand     | TGAATATATCCATCTTAATCATCCGTATAC<br>AGAATTCACC  | Figure 2                                                                                                  |
| KKC30  | Bottom strand  | GGTGAATTCTGTATACGGATGATTAAGAT<br>GGATATATTCA  | Figure 2                                                                                                  |
| KKC31  | Top strand     | TGAATATATCCATCTTAATCAGACTGATAC<br>AGAATTCACC  | Figure 2                                                                                                  |
| KKC32  | Bottom strand  | GGTGAATTCTGTATCAGTCTGATTAAGATG<br>GATATATTCA  | Figure 2                                                                                                  |
| KKC33  | Top strand     | TGAATATATCCATCTTAATCAGACGTCGAC<br>AGAATTCACC  | Figure 2                                                                                                  |
| KKC34  | Bottom strand  | GGTGAATTCTGTGCGACGTCTGATTAAGAT<br>GGATATATTCA | Figure 2                                                                                                  |
| KKC35  | Top strand     | TGAATATATCCATCTTAATCAGACGTATCA<br>AGAATTCACC  | Figure 2                                                                                                  |
| KKC36  | Bottom strand  | GGTGAATTCTTGATACGTCTGATTAAGATG<br>GATATATTCA  | Figure 2                                                                                                  |
| EBO110 | Forward primer | GACATGGAAAGGAAGACATGG                         | PCR for EMSA<br>and cleavage<br>assays (Figure<br>3B, Figure<br>6B,C)                                     |
| EBO213 | Reverse primer | GCTGTATCTAAAACAGGGACG                         |                                                                                                           |
| EBO211 | Forward primer | CAATTCACACCATTTGATGGTG                        | PCR for EMSA<br>and strand<br>transfer assays<br>(Figure 3C,D;<br>Figure 4,<br>Supplemental<br>Figure S2) |
| EBO213 | Reverse primer | GCTGTATCTAAAACAGGGACG                         |                                                                                                           |
| KKC52  | Forward primer | TATACGTCTGATTAAGATG                           | PCR (pre-<br>cleaved DNA<br>substrate) for<br>strand transfer<br>assay (Figure<br>4C)                     |
| KKC55  | Reverse primer | TGATGATAGAATAAAGAGAAG                         |                                                                                                           |
| EBO122 | Forward primer | CAAGTCTATTCGTATTCTTATTC                       | PCR for<br>cleavage assay<br>(Supplemental                                                                |

|        |                |                      |            |
|--------|----------------|----------------------|------------|
| EBO111 | Reverse primer | CTATGTATCAATTCACCACC | Figure S3) |
|--------|----------------|----------------------|------------|

**Supplementary Table 2. List of plasmids used for Kat1 expression and purification in bacteria**

| Plasmid | Kat1 mutation                            | Primers used for making mutation                                         |
|---------|------------------------------------------|--------------------------------------------------------------------------|
| pNR30   | pGAT2+KAT1G                              | Cloning of Naghmeh 84/85 in pGAT2 by Sall                                |
| pNR31   | pGAT2+KAT1G(D310A)                       | Site direct mutagenesis in pNR30 (Naghmeh29/30)                          |
| pNR38   | pGAT2+KAT1G(D377A)                       | Site direct mutagenesis in pNR30 (Naghmeh31/32)                          |
| pNR45   | pGAT2+KAT1G(E895A)                       | Site direct mutagenesis in pNR30 (Naghmeh33/34)                          |
| pNR117  | pGAT2+KAT1G(W328A)                       | Site direct mutagenesis in pNR30 (Naghmeh187/188)                        |
| pNR135  | pGAT2+KAT1G<br>(K907A/R908A/R909A/R911A) | Site direct mutagenesis in dimerization domain of pNR30 (Naghmeh183/184) |
| pNR140  | pGAT2+KAT1G (W576A)                      | Site direct mutagenesis in pNR30 (Naghmeh164/165)                        |
| pNR144  | pGAT2+KAT1G (W312A)                      | Site direct mutagenesis in pNR30 (Naghmeh185/186)                        |
| pNR204  | pGAT2+KAT1G(C130A/C133A)                 | Site direct mutagenesis in pNR30 (Naghmeh207/208)                        |
| pNR206  | pGAT2+KAT1G(F624A)                       | Site direct mutagenesis in pNR30 (Naghmeh211/212)                        |
| pNR207  | pGAT2+KAT1G(F898A)                       | Site direct mutagenesis in pNR30 (Naghmeh213/214)                        |
| pNR210  | pGAT2+KAT1G(S899A)                       | Site direct mutagenesis in pNR30 (Naghmeh219/220)                        |
| pNR213  | pGAT2+KAT1G(S906A)                       | Site direct mutagenesis in pNR30 (Naghmeh221/222)                        |
| pNR217  | pGAT2+KAT1G(S886A)                       | Site direct mutagenesis in pNR30 (Naghmeh223/224)                        |
| pNR221  | pGAT2+KAT1G(Y578A)                       | Site direct mutagenesis in pNR30 (Naghmeh205/206)                        |
| pNR225  | pGAT2+KAT1G(C402A/H405A)                 | Site direct mutagenesis in pNR30 (Naghmeh209/210)                        |

**Supplementary Table 3. List of plasmids used for Kat1 expression in yeast**

| Plasmid | Kat1 mutation    | Primers used for making mutations                                         |
|---------|------------------|---------------------------------------------------------------------------|
| pEB155  | pCXJ18- pGREG526 | pGREG526 module (EBO320/321) incorporated in pCXJ18 (HindIII& XbaI) by HR |
| pNR6    | PEB155+KAT1G     | Naghmeh167/EBO313 by drag and                                             |

|        |                                       |                                                                                          |
|--------|---------------------------------------|------------------------------------------------------------------------------------------|
|        |                                       | drop cloning                                                                             |
| pNR122 | PEB155+KAT1G(W312A)                   | Site direct mutagenesis in pNR6(Naghmeh185/186)                                          |
| pNR126 | PEB155+KAT1G(W868A)                   | Site direct mutagenesis in pNR6(Naghmeh189/190)                                          |
| pNR131 | PEB155+KAT1G(W328A)                   | Site direct mutagenesis in pNR6(Naghmeh187/188)                                          |
| pNR148 | PEB155+KAT1G(K907A/R908A/R909A/R911A) | Site direct mutagenesis of the part of the conserved hAT domain of pNR6 (Naghmeh183/184) |
| pNR151 | PEB155+KAT1G (W576A)                  | Site direct mutagenesis in pNR6(Naghmeh164/165)                                          |
| pNR208 | PEB155+KAT1G(F898A)                   | Site direct mutagenesis in pNR6(Naghmeh213/214)                                          |
| pNR228 | pEB155+KAT1G(S899A)                   | Site direct mutagenesis in pNR6 (Naghmeh219/220)                                         |
| pNR231 | pEB155+KAT1G(S906A)                   | Site direct mutagenesis in pNR6 (Naghmeh221/222)                                         |
| pNR234 | pEB155+KAT1G(S886A)                   | Site direct mutagenesis in pNR6 (Naghmeh223/224)                                         |
| pNR237 | pEB155+KAT1G(Y578A)                   | Site direct mutagenesis in pNR6 (Naghmeh205/206)                                         |
| pNR245 | PEB155+KAT1G(C130A/C133A)             | Site direct mutagenesis in pNR6 (Naghmeh207/208)                                         |
| pNR247 | PEB155+KAT1G(C402A/H405A)             | Site direct mutagenesis in pNR6 (Naghmeh209/210)                                         |
| pNR248 | PEB155+KAT1G(F624A)                   | Site direct mutagenesis in pNR6(Naghmeh211/212)                                          |

**Supplementary Table 4. List of primer(s) sequences used for site-directed mutagenesis**

| Name   | DNA sequence (5'-3')                          |
|--------|-----------------------------------------------|
| EBO313 | GCGTGACATAACTAATTACATGACTCGAGGTCGACCTAGGATTCT |
| EBO320 | GTCACGACGTTGTAAAACGACGGCCAGTGAATTCGAGCTCGGTAC |

|            |                                                                   |
|------------|-------------------------------------------------------------------|
| EBO321     | GAGCGGATAACAATTTACACAGGAAACAGCTATGACCATGATTA                      |
| Naghmeh84  | GGATCGTTCGACATGATATCATCGAGTTTACATAATTTG                           |
| Naghmeh85  | GGATCGTTCGACCTAGGATTCTGTTTTACGTAC                                 |
| Naghmeh164 | GTTAGAACAAGAGCGACATATTCTGTG                                       |
| Naghmeh165 | CACAGAATATGTTCGCTCTTGTCTAAC                                       |
| Naghmeh167 | GAATTCGATATCAAGCTTATCGATACCGTCGACAATGATATCATCGAGT<br>TTACATAATTTG |
| Naghmeh183 | CGATCCTTACAAGTGCGGCAGCGGGAGCGATCTCACCTACAAG                       |
| Naghmeh184 | CTTGTAGGTGAGATCGCTCCCGCTGCCGCACTTGTAAGGATCG                       |
| Naghmeh185 | GTTTTAGATCATGCGTCAGACACAAGG                                       |
| Naghmeh186 | CCTTGTGTCTGACGCATGATCTAAAAC                                       |
| Naghmeh187 | GTTATTGTGATTGCGGATAAATACC                                         |
| Naghmeh188 | GGTATTTATCCGCAATCACAATAAC                                         |
| Naghmeh189 | CATCACAAGATTGCGGCTGATATC                                          |
| Naghmeh190 | GATATCAGCCGCAATCTTGTGATG                                          |
| Naghmeh205 | GTTAGAACAAGATGGACAGCTTCTGTGTTATGTTTTGAAAG                         |
| Naghmeh206 | CTTTCAAACATAACACAGAAGCTGTCCATCTTGTCTAAC                           |
| Naghmeh207 | GATAATAATCTGTACAGAGCTATGCTAGCCTCCATGGTGTTAAAAG                    |
| Naghmeh208 | CTTTTAACACCATGGAGGCTAGCATAGCTCTGTACAGATTATTATC                    |
| Naghmeh209 | CTTCATTTAAGCGCTGTTAATGCTTCATTGAATGTC                              |
| Naghmeh210 | GACATTCAATGAAGCATTAAACAGCGCTTAAATGAAG                             |
| Naghmeh211 | CTTTTGAAACCATGCCAGACGATAACAG                                      |
| Naghmeh212 | CTGTTATCGTCTGGCATGGTTTCAAAG                                       |
| Naghmeh213 | CATATCGAACATATCGCCAGCATATCGTTCGATC                                |
| Naghmeh214 | GATCGACGATATGCTGGCGATATGTTTCGATATG                                |
| Naghmeh219 | CATATCGAACATATCTTCGCCATATCGTTCGATCCTTAC                           |
| Naghmeh220 | GTAAGGATCGACGATATGGCGAAGATATGTTTCGATATG                           |
| Naghmeh221 | CGTCGATCCTTACAGCTAAAAGGAGAGGAAG                                   |

|            |                                     |
|------------|-------------------------------------|
| Naghmeh222 | CTTCCTCTCCTTTTAGCTGTAAGGATCGACG     |
| Naghmeh223 | CAATCACCTAATGGACGCCATTGCTGTTTCATGAC |
| Naghmeh224 | GTCATGAAACAGCAATGGCGTCCATTAGGTGATTG |

GGTTGGTCGATGGATTTTCGTGGTCCGTTTTTTTAAAGTGGAAGTGTAGGGTGT  
 CAGTTTGACTTTACTATTATTCTCTTAATTATATACAAGTCTATTCGTATTCCT  
 TATTCAAATTACCTCAAAAAAAAAATGACAATATATCGAAGGACATATATAAAA  
 GATAAGACATGGAAAGGAAGACATGGTTGGTCTGATTTTCATTAACGTTTCAG  
**GTATAC**ATCAAATTCAGTGAATTTAATTCTGTCGTTTGAAACCAGTTTAGGT  
 GAAATTGGATTAGGTGGTGAATTGATACATAGTAAATAATTACTGGTCCATAA  
 TTTTTGTGAATATTTATGCTCTTTATACTATGTAGTTTTTATCCTGAATATTA  
 ACGATTGCTCACCTAAATTTCTCGTTTAAAATCCCTATAATGTGAATGGTTTT  
 AGATGATTCATGGTGTTTTTATTAGTGACCGAAATGTTTAGTTTTGGATACTT  
 GATGATAGAATAAAGAGAAGTGTTATGTAAAAGTGTTAATTCATGTTAAATT  
 CACTACCTTCTTGAGATTC AATTACACCATTGATGGTGAATATATCCATCT  
 TAATCAGAC**GTATAC**AGAATTCACCTTCAGATGTGTAAGAGTTTTATGTATTC  
 CAATATGTCATTTGTCAATTTGTCTGCATTTCAAACAAAGGAAAAATAAACTT  
 AAGGACATATATCTGAAAATATAACCACATAGATACGTCCTGTTTTAGATACA  
 GCATTTTCTTGGTACAAAATCCAAACATGGATATTCCAATAAATACCCTCATG  
 TTGTCAACTATGCTCAAGGAATAGCCTCACAAACCTAAATCCTCAGCATTGAC  
 CGGAGTC

**Supplementary Figure 1.** DNA sequence and oligonucleotides used in the *MATa1-MATa2* intergenic region. Arrows indicate the positions of oligonucleotide primers used for generating PCR amplified DNA substrates for DNA cleavage, DNA binding and DNA strand-transfer analyses. GTATAC at the beginning of the TIRs is shaded. The full set of oligonucleotides used are shown in Table S1.

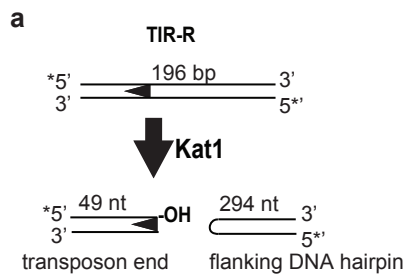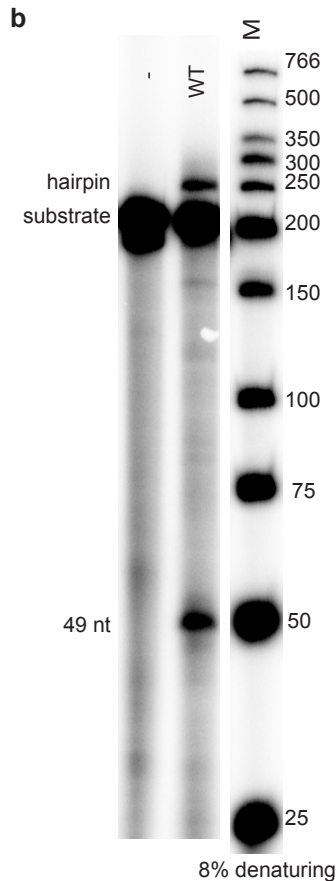

**Supplementary Figure 2.** Kat1 generates hairpin-capped DSBs. (A) *In vitro* cleavage assay using a 196-bp DNA substrate from TIR-R (generated using EBO211 and EBO 213), schematically shown. TIR indicated as black arrow head. The DNA substrate was mixed with GST-Kat1 or without protein (-) followed by separation on 8% denaturing PAGE. The substrate, hairpin and linear products are indicated. Both strands of the substrate were  $^{32}\text{P}$ -labeled in their 5'-ends. (B) Kat1 cleavage resulted in flanking DNA hairpin formation by intramolecular transesterification, expecting to generate a hairpin (~294-nts) and a ~49-nt linear product. Note that these conditions do not allow nucleotide resolution of the products. M indicates a 25-bp DNA ladder.



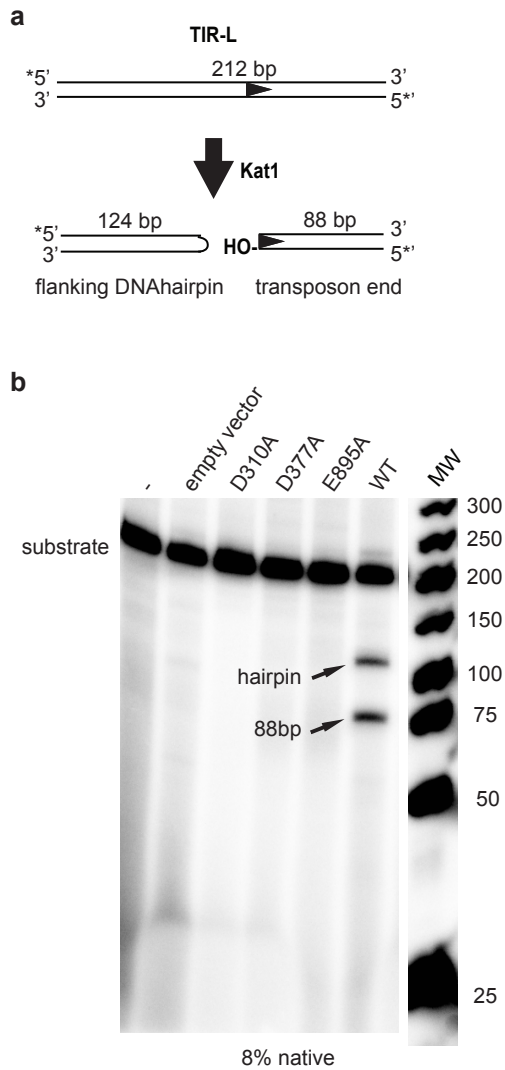

**Supplementary Figure 3.** Kat1 cleaves TIR-L *in vitro*. (A) *In vitro* cleavage assay using a 212-bp DNA substrate from TIR-L (generated using EBO111 and EBO122) schematically shown. TIR indicated as black arrow head. The expected lengths of the products are shown. (B) The DNA substrate (~4 nM) was mixed with GST-Kat1, the indicated DDE-mutants or without protein (-) followed by separation on 8% PAGE using native conditions. Kat1 cleavage resulted in flanking DNA hairpin formation by intramolecular transesterification, expecting to generate a hairpin of ~124-bp and a ~88-bp linear product. M indicates a 25-bp DNA ladder.

```

lactis      AAGACATGG----AAAGGAAGACATGGTTGGTCTGATTTTCATTAACGTTTCAGGTATACA 218
dobzhanskii AAGACATGGTGAAAAAAAAAAGACATGTTAGCTTTGATCTCATTCTGGTTTCAA GTATACA 239
marxianus   CAGAGAGAG----CTAAGACATAATGTTT--TAAGATTTTCATTTTAGTTTCAGGTATACA 217
            .*** * .*      :*.***...:*** *: * :*** ***** : *****.*****

lactis      TCAA AATTCAGTGAATT TAATTCTGTCGTTTGAACCAGTTTAGGTGAAATTGGATTAGG 278
dobzhanskii TCATAATCGAGTGAATT TGAATCTATCG-CTCAGT TGAATT TGGGTGAAC TTGAAGTACT 298
marxianus   TCAAATTTTAATGAATTC AATTGTCCTTCTTGACTAGTTTCTTGATGGATTCTGAGTACT 277
            ***:*. * .***** .*: * * * * : : * * * .*. * * * . * **

lactis      TGGTGAATT-GATACATAGTAAATAATTACTGGTCCATAATTTTTGTGAATATTTATGCT 337
dobzhanskii TGGTGAATT TAATGCATAGTAATTAATAAT---CTATACCGTCGTTGGGTAAAAATACA 355
marxianus   TGGTGAATT TAAAGTAATGGTTTACTATGTAT----TTTGAAGTTTTAG---CTATCCGAC 330
            ***** * . * .*.***: : : * : * * * * : * * * . * * .

lactis      CTTTATACTATGTAGTTTTTATCCTGAATATTA--ACGATTG---CTCACCTAAATTTCT 392
dobzhanskii GAGAGTACTTTTTGTTTGAATACTCAATTAAG-TCAGTAGTTTTTTAGCTTATTTTGT 414
marxianus   GACAGTTAACTTTATTAAATAAAATAAATCTTACTACTATTG-TTAATTTATAATTCGCT 389
            : :*.***: * * . * : :*.*** * * * : * : * . * : : : * : * * *

lactis      CG--TTTAAATCCCTATAATG----TGAATGGTTTTAGATGATT-CATGGTGT TTT-TA 444
dobzhanskii CG--TTCGATTTACACTGTAG----CAGTCCATTTCTCCTCAGCGTATCGTTTTTT-TG 467
marxianus   CTGAATAAATTTCTAATTTTTGGTATATATCTGTCTTTGGTAGTCTTAAATAACATAGTT 449
            * : * . * : * * . : * : * * : * * : * . * : : * : *

lactis      TTAGTGACCGAAATGTTTAGT-TTTGGTACTTTGATGATAGAAATAAAGAG--AAGTGTTA 501
dobzhanskii CTGGTATCAGAAAGATGAAAT-ATTGCTGAAGTATTCGTGACAGTAAGTC--AACAGCTC 524
marxianus   TTGGAAGCTGTTTATATCTTGTAAACTGATTTAAATATAACCAA AATTCA TAAGAGAGC 509
            * . * . * * : : * . * : : : : * * * : * . * * : * * : * * *

lactis      TGTA AAAAGTGTTAATTCATGTTA AATTC ACTACCTTCTTGAGATTC AATTC ACCATT 561
dobzhanskii ATTCAAAAGTGTTAATTC TGGTAG AATTC ACCA ACTTCTTGAGAGTCAATTC ACTACAAT 584
marxianus   TTAATAAATGGTTAATTCATCAGAAATTC ACCAGTTCTTCATAAATGAAATCACC AACTC 569
            : : : * * * * * : : * . * * * * * * * * * * * * * * * * * * * *

lactis      TGATGGTGAATATATCCATCTTAATCAGACGTATACAG--AATTCACCTTCAGATGTGTA 619
dobzhanskii TGAAGGTGAATACATCCACCTAAATCAGATGTATACAGGAAATACATGTTGTGATG-CAG 643
marxianus   TTCGGGTGAATTTATTCACCATATTTTGCTGTATACAGTA----AACTAATGAAAACCTTC 625
            * . * * * * * : * * * * : * : * * * * * * * * * * * * * * * *

```

TGAATT - subterminal repeat, AATTC A-complement of subterminal repeat,  
GTATAC -Beginning of TIRs

**Supplementary Figure 4.** Multiple sequence alignment of the *MATa1-a2* intergenic region in *K. lactis*, *K. dobzhanskii* and *K. marxianus*. Identical bases in all three species are indicated by asterisks. GTATAC in blue represents the beginning of TIRs. 5'-TGAATT (yellow) and its reverse complement (red) are subterminal repeats.

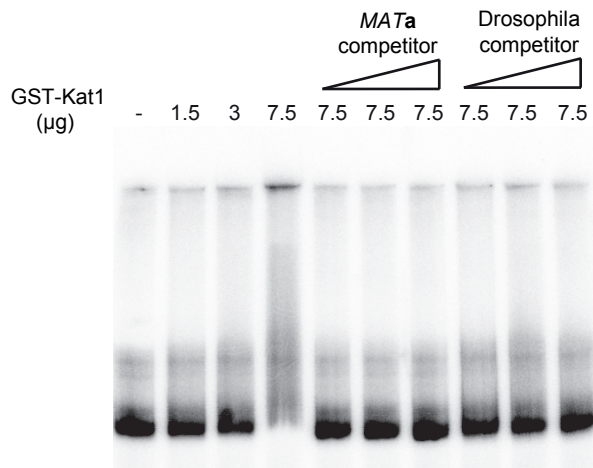

**Supplementary Figure 5. Kat1-DNA binding is not sequence specific.** EMSA was performed with *MATa1-MATa2* intergenic region (579 bp) covering TIR-L and TIR-R, with increasing amounts of Kat1 for 1h at 4°C. Identical amounts (75, 150 and 300ng/reaction) of two different competitor duplexes, same as the probe and *Drosophila* DNA (570 bp) were used to compete the bandshift.

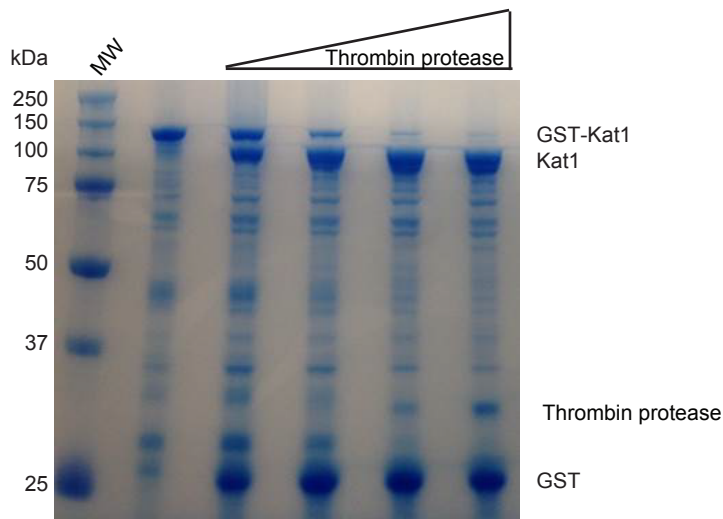

**Supplementary Figure 6.** Thrombin protease cleavage of GST-Kat1. Coomassie-stained SDS-PAGE showing cleavage of the GST tag from the GST-Kat1 fusion protein. Approximately 10  $\mu\text{g}$  of Kat1 was incubated with increasing concentrations (0.5, 1, 2.5, 5, 10 units) of thrombin protease for 22 hours at 4°C. The molecular weight (MW) is shown on the left. GST-Kat1, Kat1, GST and thrombin protease are indicated on the right.



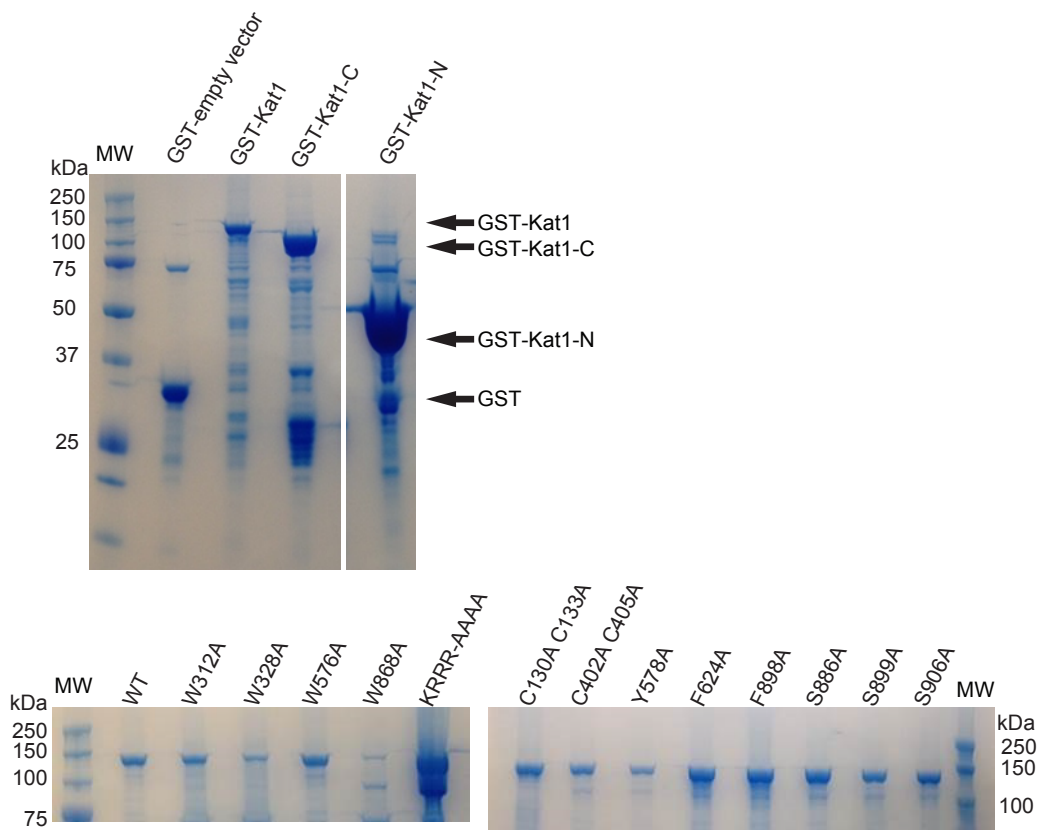

**Supplementary Figure 8.** Kat1 mutant proteins are stable *in vitro*. Coomassie-stained SDS-PAGE showing recombinant GST (26 kDa), GST-Kat1 (136 kDa), GST-Kat1-C (amino acids 201-958, 113 kDa), GST-Kat1-N (amino acids 1-200, 49 kDa), and GST-Kat1 proteins with indicated amino acid substitutions (bottom panel). The molecular weight marker (MW) is indicated. Table S2 describes the plasmids used for expressing the proteins.

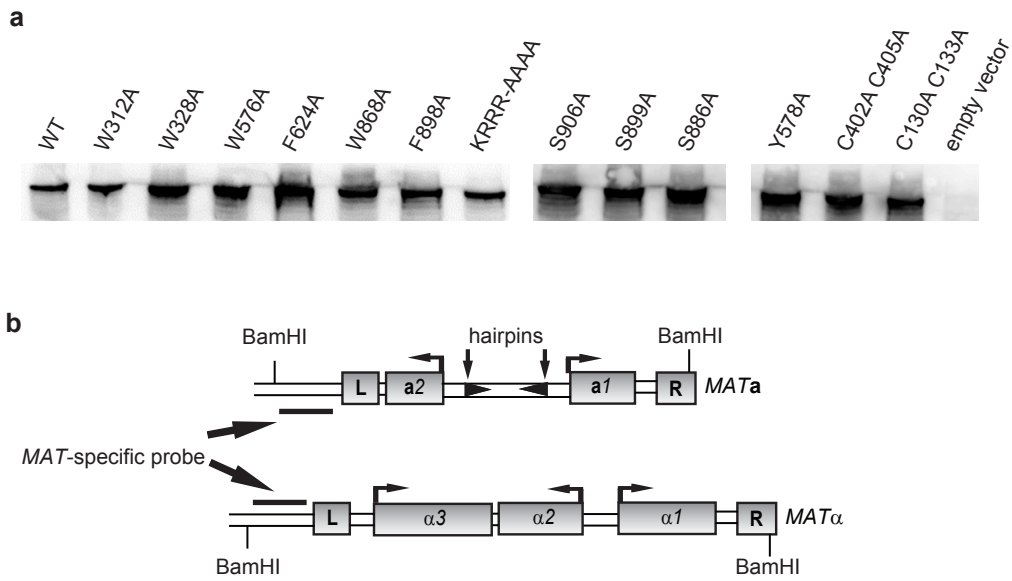

**Supplementary Figure 9.** (A) Kat1 mutant proteins are stable *in vivo*. Protein-blot analysis using whole cell extracts from a *MATa kat1Δ* strain (SAY1597) containing the empty vector or plasmids expressing Kat1, and Kat1 mutants. An anti-Myc antibody (9E11) was used to detect expression of Myc-tagged Kat1. The equivalent of 0.2A<sub>600</sub> units of cells were loaded in each lane. Table S3 describes the plasmids used for expressing the proteins. (B) Schematic drawing of the *MATa* and *MATα* loci with the BamHI-sites indicated and the sites of Kat1 cleavage shown (arrows). Boxes denote genes and the repetitive elements Left (L) and Right (R). The *MAT*-specific probe is also indicated.
